# Supplementary material
Source: HighWire-hosted journal article supplement (https://erj.ersjournals.com/content/55/4/1901694)
Supplement: inline-supplementary-material-2 [file inline-supplementary-material-2.pdf]

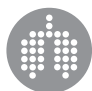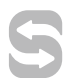

SHAREABLE PDF

# Early markers of cystic fibrosis structural lung disease: follow-up of the ACFBAL cohort

Naomi E. Wijker<sup>1,2,13</sup>, Suzanna Vidmar<sup>3,4,13</sup>, Keith Grimwood<sup>5,6</sup>, Peter D. Sly<sup>7</sup>, Catherine A. Byrnes<sup>8</sup>, John B. Carlin<sup>3,4</sup>, Peter J. Cooper<sup>9</sup>, Colin F. Robertson<sup>10</sup>, R. John Massie<sup>10</sup>, Mariette P.C. Kemner van de Corput<sup>1,2</sup>, Joyce Cheney<sup>11,12</sup>, Harm A.W.M. Tiddens<sup>1,14</sup> and Claire E. Wainwright <sup>11,12,14</sup> for the Australasian Cystic Fibrosis Bronchoalveolar Lavage (ACFBAL) and Follow-up of the ACFBAL (CF-FAB) study groups

**Affiliations:** <sup>1</sup>Pulmonology and Allergology, Erasmus Medical Center Sophia Children's Hospital, Rotterdam, The Netherlands. <sup>2</sup>Radiology and Nuclear Medicine, Erasmus Medical Center, Rotterdam, The Netherlands. <sup>3</sup>Clinical Epidemiology and Biostatistics Unit, Murdoch Children's Research Institute, Melbourne, Australia. <sup>4</sup>Dept of Paediatrics, University of Melbourne, Melbourne, Australia. <sup>5</sup>School of Medicine and Menzies Health Institute Queensland, Griffith University Gold Coast Campus, Gold Coast, Australia. <sup>6</sup>Depts of Infectious Diseases and Paediatrics, Gold Coast Health, Gold Coast, Australia. <sup>7</sup>Child Health Research Centre, The University of Queensland, Brisbane, Australia. <sup>8</sup>Starship Children's Health and Dept of Paediatrics, University of Auckland, Auckland, New Zealand. <sup>9</sup>Dept of Respiratory and Sleep Medicine, The Children's Hospital at Westmead, Sydney, Australia. <sup>10</sup>Dept of Respiratory Medicine, Royal Children's Hospital, Melbourne, Australia. <sup>11</sup>Dept of Respiratory and Sleep Medicine, Queensland Children's Hospital, Brisbane, Australia. <sup>12</sup>School of Medicine, The University of Queensland, Brisbane, Australia. <sup>13</sup>N.E. Wijker and S. Vidmar contributed equally to this paper. <sup>14</sup>H.A.W.M. Tiddens and C.E. Wainwright contributed equally to this paper.

**Correspondence:** Harm A.W.M. Tiddens, Wytemaweg 80, 3015 CN Rotterdam, The Netherlands. E-mail: h.tiddens@erasmusmc.nl

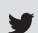

@ERSpublications

**In children with cystic fibrosis, airways disease severity on chest computed tomography at age 5 years increased the risk of bronchiectasis in adolescence and its extent was predicted by poorer nutrition, airway inflammation, and atelectasis** <http://bit.ly/2Nnk8LW>

**Cite this article as:** Wijker NE, Vidmar S, Grimwood K, *et al.* Early markers of cystic fibrosis structural lung disease: follow-up of the ACFBAL cohort. *Eur Respir J* 2020; 55: 1901694 [<https://doi.org/10.1183/13993003.01694-2019>].

This single-page version can be shared freely online.

**ABSTRACT** Little is known about early predictors of later cystic fibrosis (CF) structural lung disease. This study examined early predictors of progressive structural lung abnormalities in children who completed the Australasian CF Bronchoalveolar Lavage (ACFBAL) clinical trial at age 5-years and participated in an observational follow-up study (CF-FAB).

Eight Australian and New Zealand CF centres participated in CF-FAB and provided follow-up chest computed-tomography (CT) scans for children who had completed the ACFBAL study with baseline scans at age 5-years. CT scans were annotated using PRAGMA-CF scoring. Ordinal regression analysis and linear regression were used to investigate associations between PRAGMA-CF (Perth–Rotterdam Annotated Grid Morphometric Analysis for CF) outcomes at follow-up and variables measured during the ACFBAL study.

99 out of 157 ACFBAL children (mean±SD age 13±1.5 years) participated in the CF-FAB study. The probability of bronchiectasis at follow-up increased with airway disease severity on the baseline CT scan. In multiple regression (retaining factors at  $p < 0.05$ ) the extent of bronchiectasis at follow-up was associated

with baseline atelectasis (OR 7.2, 95% CI 2.4–22;  $p \leq 0.001$ ), bronchoalveolar lavage (BAL)  $\log_2$  interleukin (IL)-8 (OR 1.2, 95% CI 1.05–1.5;  $p=0.010$ ) and body mass index z-score (OR 0.49, 95% CI 0.24–1.00;  $p=0.05$ ) at age 5 years. Percentage trapped air at follow-up was associated with BAL  $\log_2$  IL-8 (coefficient 1.3, 95% CI 0.57–2.1;  $p<0.001$ ) at age 5 years.

The extent of airway disease, atelectasis, airway inflammation and poor nutritional status in early childhood are risk factors for progressive structural lung disease in adolescence.
